# Supplementary material for: FoxJ1-dependent gene expression is required for differentiation of radial glia into ependymal cells and a subset of astrocytes in the postnatal brain
Source: Oxford University Press journal article supplement (doi:10.1242/dev.041129), 2009-11-11
Supplement: dev041129-sup-041129-tables1.pdf [file dev041129-sup-041129-tables1.pdf]

Table S1. Putative target genes regulated by FOXJ1 with confirmed expression in the SCN

| <i>Gene</i>                            | <b>Affymetrix Probe set ID</b> | <b>RefSeq Transcript ID (NCBI)</b> | <b>Chr</b> | <b>Biological Process(es)</b>                                                    | <b>Molecular Function(s)</b>                                              | <b>Cell compartment(s)</b>                                                         |
|----------------------------------------|--------------------------------|------------------------------------|------------|----------------------------------------------------------------------------------|---------------------------------------------------------------------------|------------------------------------------------------------------------------------|
| <b>Secreted factors</b>                |                                |                                    |            |                                                                                  |                                                                           |                                                                                    |
| <i>Ttr</i>                             | 10454192                       | NM_013697                          | chr18      | thyroid hormone generation // transport                                          | hormone activity // steroid binding // retinal binding // retinol binding | extracellular region                                                               |
| <b>Extracellular matrix</b>            |                                |                                    |            |                                                                                  |                                                                           |                                                                                    |
| <i>Prelp</i>                           | 10357870                       | NM_054077                          | chr1       | cell aging                                                                       | protein binding                                                           | extracellular region // proteinaceous extracellular matrix                         |
| <b>Membrane Associated Proteins</b>    |                                |                                    |            |                                                                                  |                                                                           |                                                                                    |
| <i>Cldn2</i>                           | 10602033                       | NM_016675                          | chrX       | calcium-independent cell-cell adhesion                                           | structural molecule activity                                              | tight junction // membrane // cell junction                                        |
| <i>Tm4sf1</i>                          | 10498273                       | NM_008536                          | chr3       | ---                                                                              | ---                                                                       | membrane                                                                           |
| <b>Membrane Channels</b>               |                                |                                    |            |                                                                                  |                                                                           |                                                                                    |
| <i>Clic6</i>                           | 10436958                       | NM_172469                          | chr16      | transport // ion transport // chloride transport                                 | voltage-gated ion channel activity                                        | cytoplasm // membrane                                                              |
| <i>Kcnj16</i>                          | 10382316                       | NM_010604                          | chr11      | potassium ion transport                                                          | inward rectifier potassium channel activity                               | membrane                                                                           |
| <b>Sperm/flagellum/cilium Proteins</b> |                                |                                    |            |                                                                                  |                                                                           |                                                                                    |
| <i>Efhc1</i>                           | 10345046                       | EU520262                           | chr1       | cellular calcium ion homeostasis // positive regulation of apoptosis             | calcium ion binding                                                       | cilium // axoneme // flagellum // cell soma                                        |
| <i>Spag6</i>                           | 10438049                       | NM_015773                          | chr16      | spermatogenesis // cell projection organization and biogenesis // sperm motility | binding                                                                   | cytoplasm // cytoskeleton // microtubule // cilium // flagellum // cell projection |
| <i>Spa17</i>                           | 10592336                       | NM_011449                          | chr9       | signal transduction // binding of sperm to zona pellucida                        | cAMP-dependent protein kinase regulator activity                          | membrane                                                                           |
| <i>Spata17</i>                         | 10360942                       | NM_028848                          | chr1       | spermatogenesis                                                                  | calmodulin binding                                                        | cytoplasm                                                                          |
| <i>Spata18</i>                         | 10522445                       | BC050799                           | chr5       | spermatogenesis                                                                  | ---                                                                       | cytoplasm                                                                          |
| <i>Tsnaxip1</i>                        | 10574880                       | NM_024445                          | chr8       | multicellular organismal development // spermatogenesis // cell differentiation  | protein binding                                                           | cytoplasm                                                                          |
| <b>Calcium Binding Proteins</b>        |                                |                                    |            |                                                                                  |                                                                           |                                                                                    |
| <i>Capsl</i>                           | 10423024                       | NM_029341                          | chr15      | ---                                                                              | calcium ion binding                                                       | cytoplasm                                                                          |
| <i>Calml4</i>                          | 10586118                       | NM_138304                          | chr9       | ---                                                                              | calcium ion binding                                                       | ---                                                                                |
| <i>Efcab1</i>                          | 10433782                       | NM_025769                          | chr16      | ---                                                                              | calcium ion binding                                                       | ---                                                                                |
| <i>Efhb</i>                            | 10451786                       | NM_172497                          | chr17      | ---                                                                              | calcium ion binding                                                       | ---                                                                                |
| <i>Prrg4</i>                           | 10485624                       | NM_178695                          | chr2       | ---                                                                              | calcium ion binding                                                       | extracellular region                                                               |

Table S1. Putative target genes regulated by FOXJ1 with confirmed expression in the SCN

| Kinase/Phosphatase Proteins |          |                    |       |                                                                                                                                                                                                                                         |                                                                                                                                                                                                   |                                                                                                  |
|-----------------------------|----------|--------------------|-------|-----------------------------------------------------------------------------------------------------------------------------------------------------------------------------------------------------------------------------------------|---------------------------------------------------------------------------------------------------------------------------------------------------------------------------------------------------|--------------------------------------------------------------------------------------------------|
| <b><i>Cdk14</i></b>         | 10453166 | NM_001033443       | chr17 | protein amino acid phosphorylation                                                                                                                                                                                                      | nucleotide binding // protein kinase activity // protein serine/threonine kinase activity // cyclin-dependent protein kinase activity // ATP binding // kinase activity // transferase activity   | cytoplasm                                                                                        |
| <b><i>Musk</i></b>          | 10505145 | NM_001037127       | chr4  | regulation of transcription, DNA-dependent // protein amino acid phosphorylation // neuromuscular junction development // regulation of synaptic growth at neuromuscular junction // receptor clustering // receptor clustering         | protein serine/threonine kinase activity // protein tyrosine kinase activity // receptor activity // ATP binding // transferase activity                                                          | plasma membrane // integral to plasma membrane // integral to membrane // neuromuscular junction |
| <b><i>Nek5</i></b>          | 10577471 | NM_177898          | chr8  | protein amino acid phosphorylation                                                                                                                                                                                                      | nucleotide binding // magnesium ion binding // protein kinase activity // protein serine/threonine kinase activity // ATP binding // kinase activity // transferase activity // metal ion binding | ---                                                                                              |
| <b><i>Iqca</i></b>          | 10356512 | ENSMUST00000113094 | chr1  | ---                                                                                                                                                                                                                                     | nucleotide binding // ATP binding // nucleoside-triphosphatase activity                                                                                                                           | ---                                                                                              |
| <b><i>Ysk4</i></b>          | 10357381 | XM_914055          | chr1  | Homologue of Sps1/Ste20-related kinase 4 (Yeast)                                                                                                                                                                                        | ---                                                                                                                                                                                               | ---                                                                                              |
| Metabolic Proteins          |          |                    |       |                                                                                                                                                                                                                                         |                                                                                                                                                                                                   |                                                                                                  |
| <b><i>Apoe</i></b>          | 10560624 | NM_009696          | chr7  | lipid metabolic process // cholesterol catabolic process // transport // cellular calcium ion homeostasis // response to oxidative stress // regulation of gene expression // axon regeneration // vasodilation // artery morphogenesis | lipid transporter activity // lipoprotein binding // heparin binding // lipid binding // cholesterol transporter activity                                                                         | extracellular region // extracellular space // chylomicron                                       |
| <b><i>Bbox1</i></b>         | 10485700 | NM_130452          | chr2  | carnitine biosynthetic process // oxidation reduction                                                                                                                                                                                   | iron ion binding // gamma-butyrobetaine dioxygenase activity // electron carrier activity // oxidoreductase activity                                                                              | cytoplasm                                                                                        |
| <b><i>Car9</i></b>          | 10504337 | NM_139305          | chr4  | morphogenesis of an epithelium // one-carbon compound metabolic process // secretion                                                                                                                                                    | carbonate dehydratase activity // zinc ion binding // lyase activity                                                                                                                              | membrane // cell projection                                                                      |
| <b><i>Cpn1</i></b>          | 10467887 | NM_030703          | chr19 | proteolysis                                                                                                                                                                                                                             | carboxypeptidase activity // metallopeptidase activity // zinc ion binding                                                                                                                        | extracellular region                                                                             |

Table S1. Putative target genes regulated by FOXJ1 with confirmed expression in the SCN

|                                                     |          |                    |       |                                                                                                                     |                                                                                                                                                                                                                             |                                  |
|-----------------------------------------------------|----------|--------------------|-------|---------------------------------------------------------------------------------------------------------------------|-----------------------------------------------------------------------------------------------------------------------------------------------------------------------------------------------------------------------------|----------------------------------|
| <b><i>Dnajb13</i></b>                               | 10565890 | NM_153527          | chr7  | protein folding                                                                                                     | heat shock protein binding // unfolded protein binding                                                                                                                                                                      | ---                              |
| <b><i>Enpp2</i></b>                                 | 10428619 | NM_015744          | chr15 | chemotaxis // lipid catabolic process                                                                               | nucleic acid binding // endonuclease activity // phosphodiesterase I activity // nucleotide diphosphatase activity // hydrolase activity // metal ion binding // alkylglycerophosphoethanolamine phosphodiesterase activity | extracellular region // membrane |
| <b><i>Folr1</i></b>                                 | 10566034 | NM_008034          | chr7  | posttranslational protein targeting to membrane // folic acid metabolic process                                     | receptor activity // folic acid binding // folic acid transporter activity                                                                                                                                                  | membrane                         |
| <b><i>Hspa8</i></b>                                 | 10584572 | NM_031165          | chr9  | protein folding // response to stress // chaperone cofactor-dependent protein folding // regulation of cell cycle   | nucleotide binding // protein binding // ATP binding // ATPase activity // unfolded protein binding                                                                                                                         | cytoplasm                        |
| <b><i>Mdh1b</i></b>                                 | 10355121 | NM_029696          | chr1  | carbohydrate metabolic process // tricarboxylic acid cycle // malate metabolic process // oxidation reduction       | catalytic activity // oxidoreductase activity // malate dehydrogenase activity                                                                                                                                              | ---                              |
| <b><i>Wdr66</i></b>                                 | 10525516 | BC138176           | chr5  | ---                                                                                                                 | peptidase activity                                                                                                                                                                                                          | ---                              |
| <b>Cytoskeletal/microtubule Associated Proteins</b> |          |                    |       |                                                                                                                     |                                                                                                                                                                                                                             |                                  |
| <b><i>Dynl1</i></b>                                 | 10532984 | NM_019682          | chr5  | microtubule-based process // microtubule-based movement // negative regulation of nitric oxide biosynthetic process | motor activity // microtubule motor activity // enzyme inhibitor activity                                                                                                                                                   | cytoplasm // cytoskeleton        |
| <b><i>Dynlrb2</i></b>                               | 10575725 | NM_029297          | chr8  | ---                                                                                                                 | motor activity                                                                                                                                                                                                              | cytoplasm // cytoskeleton        |
| <b><i>Dnahc11</i></b>                               | 10403112 | NM_010060          | chr12 | ciliary or flagellar motility // determination of left/right symmetry                                               | nucleotide binding // microtubule motor activity // ATP binding                                                                                                                                                             | cilium                           |
| <b><i>Dnahc12</i></b>                               | 10413333 | ENSMUST00000073309 | chr14 | ---                                                                                                                 | ---                                                                                                                                                                                                                         | ---                              |
| <b><i>Dnahc3</i></b>                                | 10567446 | BC051401           | chr7  | microtubule-based movement // biological_process                                                                    | nucleotide binding // molecular_function // motor activity // microtubule motor activity // ATP binding // ATPase activity // nucleoside-triphosphatase activity                                                            | cytoskeleton // cilium           |
| <b><i>Dnahc5</i></b>                                | 10423388 | NM_133365          | chr15 | ciliary or flagellar motility // microtubule-based movement                                                         | nucleotide binding // motor activity // microtubule motor activity // ATP binding // ATPase activity // nucleoside-triphosphatase activity                                                                                  | cytoskeleton // cilium           |
| <b><i>Dnahc6</i></b>                                | 10545502 | ENSMUST00000114040 | chr6  | ---                                                                                                                 | ---                                                                                                                                                                                                                         | ---                              |
| <b><i>Dnahc9</i></b>                                | 10387029 | NM_001099633       | chr11 | ---                                                                                                                 | nucleotide binding // ATP binding                                                                                                                                                                                           | cilium                           |

Table S1. Putative target genes regulated by FOXJ1 with confirmed expression in the SCN

|                         |          |              |       |                                                                                                     |                                                                                                                                        |                                                       |
|-------------------------|----------|--------------|-------|-----------------------------------------------------------------------------------------------------|----------------------------------------------------------------------------------------------------------------------------------------|-------------------------------------------------------|
| <b><i>Dnaic1</i></b>    | 10504072 | NM_175138    | chr4  | ---                                                                                                 | motor activity                                                                                                                         | cytoskeleton // cilium                                |
| <b><i>Dnali1</i></b>    | 10516259 | NM_175223    | chr4  | ---                                                                                                 | motor activity                                                                                                                         | dynein complex                                        |
| <b><i>Kif27</i></b>     | 10409666 | NM_175214    | chr13 | microtubule-based movement                                                                          | nucleotide binding // motor activity // microtubule motor activity // ATP binding                                                      | microtubule // microtubule associated complex         |
| <b><i>Kif6</i></b>      | 10445839 | NM_177052    | chr17 | ---                                                                                                 | nucleotide binding // motor activity // ATP binding                                                                                    | microtubule                                           |
| <b><i>Kif9</i></b>      | 10589541 | NM_010628    | chr9  | microtubule-based movement                                                                          | nucleotide binding // motor activity // microtubule motor activity // ATP binding                                                      | microtubule // microtubule associated complex         |
| <b><i>Rshl3</i></b>     | 10362472 | BC138000     | chr10 | ---                                                                                                 | ---                                                                                                                                    | cilium (unconfirmed)                                  |
| <b><i>Tekt4</i></b>     | 10442807 | NM_027951    | chr17 | microtubule cytoskeleton organization and biogenesis // cell projection organization and biogenesis | structural molecule activity                                                                                                           | microtubule // cilium // flagellum // cell projection |
| <b><i>Tmod1</i></b>     | 10504692 | NM_021883    | chr4  | myofibril assembly // muscle thick filament assembly                                                | actin binding // tropomyosin binding                                                                                                   | cytoplasm // cytoskeleton // myofibril                |
| <b><i>Ttll6</i></b>     | 10380599 | NM_172799    | chr11 | protein modification process                                                                        | tubulin-tyrosine ligase activity                                                                                                       | cilium // cell projection                             |
| <b>Nuclear Proteins</b> |          |              |       |                                                                                                     |                                                                                                                                        |                                                       |
| <b><i>Meig1</i></b>     | 10479761 | NM_008579    | chr2  | meiosis                                                                                             | protein binding                                                                                                                        | nucleus                                               |
| <b><i>Mns1</i></b>      | 10586907 | NM_008613    | chr9  | meiosis                                                                                             | ---                                                                                                                                    | nucleus // nuclear envelope // intermediate filament  |
| <b><i>Mif1</i></b>      | 10492469 | NM_001039543 | chr3  | myeloid progenitor cell differentiation // transcription // cell cycle // cell differentiation      | DNA binding // protein binding                                                                                                         | nucleus // cytoplasm                                  |
| <b><i>Nek11</i></b>     | 10596327 | NM_172461    | chr9  | protein amino acid phosphorylation // cell cycle                                                    | nucleotide binding // protein kinase activity // protein serine/threonine kinase activity // transferase activity // metal ion binding | nucleus                                               |
| <b><i>Syne1</i></b>     | 10361381 | NM_001079686 | chr10 | biological_process                                                                                  | actin binding // protein binding                                                                                                       | nuclear envelope // sarcomere                         |

**Table S1.** List of 55 characterized genes consistently and significantly down regulated in the *FoxJ1 null* SCN during early postnatal development (P1-P14). Expression of these genes in the ependymal layer of the SVZ and in the RMS was confirmed in the Allen Brain Atlas (<http://mouse.brain-map.org/>); Chr, chromosome; ---, information not available or unknown.
