# Supplementary material for: FoxJ1-dependent gene expression is required for differentiation of radial glia into ependymal cells and a subset of astrocytes in the postnatal brain
Source: Oxford University Press journal article supplement (doi:10.1242/dev.041129), 2009-11-11
Supplement: dev041129-sup-041129-tables2.pdf [file dev041129-sup-041129-tables2.pdf]

**Table S2. Primers used for qRT-PCR verification of selected genes from microarray experiments and internal control genes**

| Gene                                      | Forward primer (5'-3') | Reverse primer (5'-3')   |
|-------------------------------------------|------------------------|--------------------------|
| <i>FoxJ1</i>                              | ACCCTACTCTATGCCACTTCAT | TGCATGGCGGAAGTAGCAGAAGTT |
| <i>Dnahc3</i>                             | ACTCGTCTGAGGAATCCACATT | GTACTIONGATCCGTAATCCAGC  |
| <i>Dnahc5</i>                             | CTCTGTCTAGTCTGGGCATA   | AAGAAATGCAGGAGTCAGCC     |
| <i>Dnahc6</i>                             | GTAACCAATGAGCCTCCAAAAG | GGAACTCTGGTCTGGATTGAAG   |
| <i>Dnahc9</i>                             | TTGCCTTGCTTCTCCAGATT   | AATCTATCACCCACCACCCA     |
| <i>Dnahc11</i>                            | GGAAGACCTCCGTTACCTCTTT | GAGTCCAAGTATCAAGTTCCCG   |
| <i>Dnahc12</i>                            | GTGTAGTGTTCAATTGCTCCGA | TCGAAGAAGCAGTATGTCCTCA   |
| <i>Dnaic1</i>                             | CACTGCCTTTGACTTCCACA   | CACAGCGTCTACTGCCATGT     |
| <i>Dnali1</i>                             | ACTCCCAGTGTTTTGACGAACT | GTTAGTGAGATGACAAAGCCCC   |
| <i>Dynlrb2</i>                            | CCTCCTGACGATACCTGGAA   | ATCCCTGACTGTGCTCTTGG     |
| <i>Dynll1</i>                             | GCTTCTTACGGAGAGCCTCA   | GCACACACCAACAGCAAAGT     |
| <i>Tekt4</i>                              | GAACACCAGATTGCAGCCTT   | AACCTGAACTGGGCATTGTC     |
| <i>Kif6</i>                               | CTCTGGGGAAAGTGACCAAC   | CTTGGTCTTCCAAATAGGATGC   |
| <i>Kif27</i>                              | GCGAGAAAACGGAACGTAAAC  | CTTTTGCTGGAGGGTCAGTC     |
| <i>Kif9</i>                               | AAGACTCCTTAGGGGGAAACTG | GTCTTTGAGATCCCCATCTTTG   |
| <i>Ttll6</i>                              | ATTGCCAGTGGAAGAGAGA    | CCAGCAAGACTGAAGGGGAAG    |
| <i>Rshl3</i>                              | CAAGCCCACCACCAGTTTAT   | TGTGTCATCCTGAAAGCCTG     |
| <b>Internal controls</b>                  |                        |                          |
| <i>TransfRec</i> (signal: 25-75)          | TTCCGCTCGTGGAGACTACT   | ACATAGGGCGACAGGAAGTG     |
| <i>Pcx</i> (signal: 100-200)              | CTGGCAGGTAGTTGCTCACA   | GGTAGAAGCCCTAAGCCACC     |
| <i>MUR_b2</i> (signal: 600-1000)          | AAAACATGGGCTGGTGAGAT   | TGGTTGCTGGGATTTGAACT     |
| <i>18SrRNA</i> (signal: 6000-9000)        | CGAAAGCATTTGCCAAGAAT   | AGTCGGCATCGTTTATGGTC     |
| <i>GAPDH</i> (signal: 10,000-15,000)      | TGTTCTACCCCAATGTGT     | GAGTTGCTGTTGAAGTCGCA     |
| <i>B2-element</i> (signal: 14,000-20,000) | CAAAAATCTGATGCCTGGT    | GGGGAATAATGCTTCAGTGG     |
